# Supplementary material for: Glycan Epitope and Integrin Expression Dynamics Characterize Neural Crest Epithelial-to-Mesenchymal Transition (EMT) in Human Pluripotent Stem Cell Differentiation
Source: PubMed Central journal article supplement (PMC9622562; doi:10.1007/s12015-022-10393-1), 2022-06-21
Supplement: 12015_2022_10393_MOESM1_ESM.pdf [file 12015_2022_10393_MOESM1_ESM.pdf]

## Supplementary Material

Thomas *et al.*:

Glycan epitope and integrin expression dynamics characterize neural crest epithelial-to-mesenchymal transition (EMT) in human pluripotent stem cell differentiation

Suppl. Table 1 – Spearman correlation matrix of CD antigens, as shown, across NCR *in vitro* culture.

| <i>marker</i>        | CD29 <sup>high</sup> | CD146 | CD51/61 | CD49e | CD44 <sup>high</sup> | CD73  | CD133 | CD49f | CD24 | CD57 |
|----------------------|----------------------|-------|---------|-------|----------------------|-------|-------|-------|------|------|
| CD29 <sup>high</sup> | 1                    |       |         |       |                      |       |       |       |      |      |
| CD146                | 0.8                  | 1     |         |       |                      |       |       |       |      |      |
| CD51/61              | 0.55                 | 0.57  | 1       |       |                      |       |       |       |      |      |
| CD49e                | 0.53                 | 0.56  | 0.77    | 1     |                      |       |       |       |      |      |
| CD44 <sup>high</sup> | 0.39                 | 0.29  | 0.54    | 0.69  | 1                    |       |       |       |      |      |
| CD73 <sup>high</sup> | 0.34                 | 0.23  | 0.75    | 0.58  | 0.72                 | 1     |       |       |      |      |
| CD133                | -0.1                 | 0.03  | -0.17   | -0.3  | -0.67                | -0.51 | 1     |       |      |      |
| CD49f                | -0.52                | -0.56 | -0.72   | -0.51 | -0.13                | -0.24 | -0.19 | 1     |      |      |
| CD24                 | -0.69                | -0.76 | -0.84   | -0.8  | -0.55                | -0.68 | 0.34  | 0.49  | 1    |      |
| CD57                 | -0.58                | -0.57 | -0.89   | -0.86 | -0.72                | -0.79 | 0.43  | 0.64  | 0.84 | 1    |

## Supplementary Figures

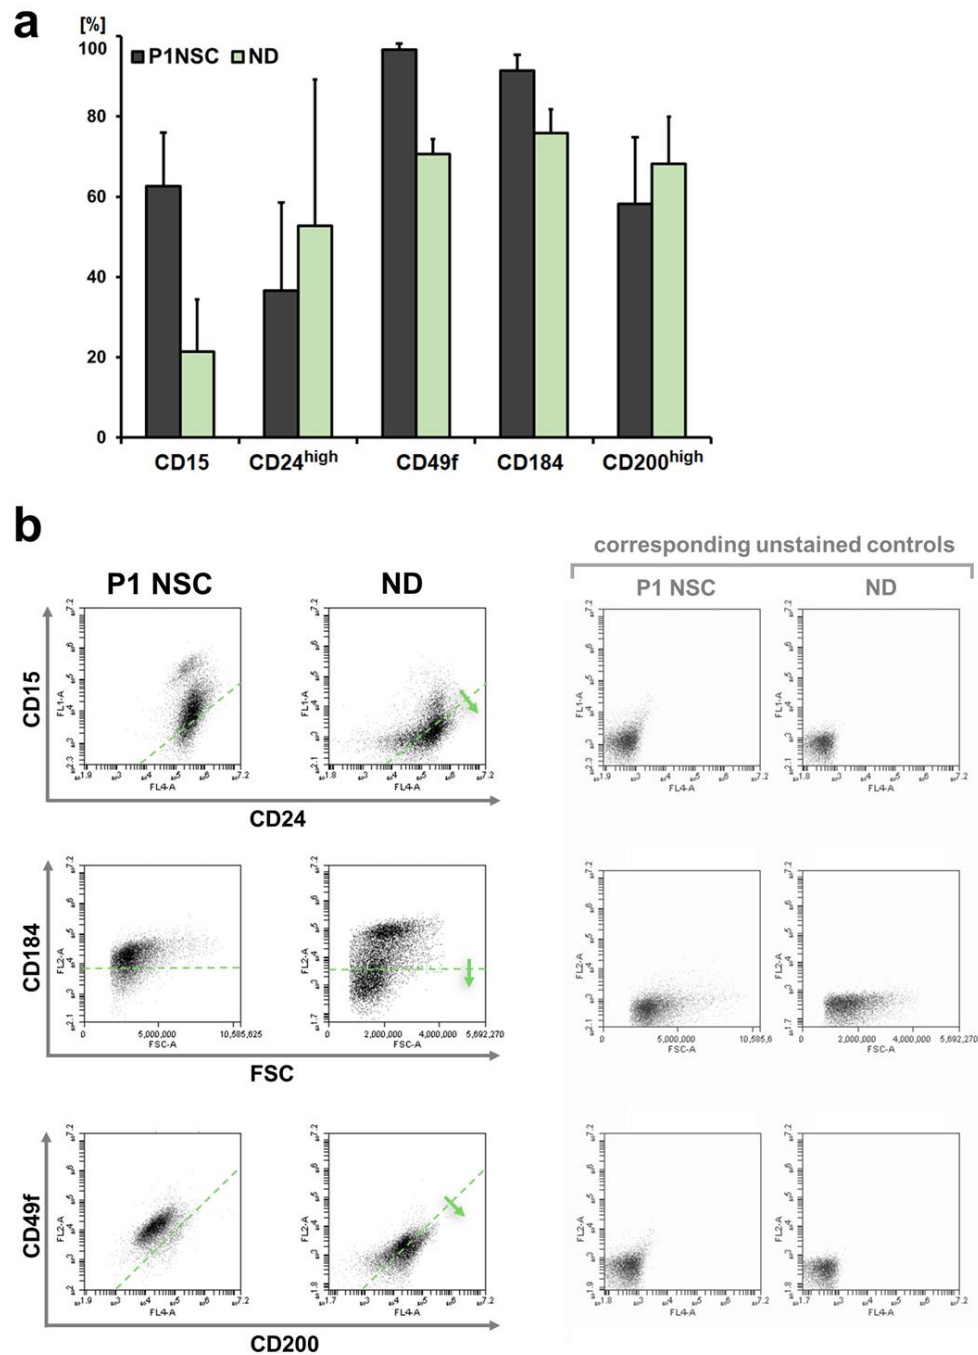

**Suppl. Fig. 1:** (a) Surface marker expression for CD15<sup>+</sup>, CD24<sup>high</sup>, CD49f<sup>+</sup>, CD184<sup>+</sup> and CD200<sup>high</sup> at P1 neural stem cell (P1 NSC) versus neuronal differentiation (ND) stage are shown (n≥3 independent experimental repeats; error bars indicating standard deviation). (b) Bivariate flow cytometric dot plots comparing subpopulation shifts CD15/CD24, CD184, and CD49f/CD200 (representative experimental repeat of the above series; right panels: corresponding unstained controls as a reference point). Dotted lines added to facilitate visualization. Arrows indicate main directionality of subpopulation shifts upon neuronal differentiation: enhanced CD15<sup>-</sup>/CD24<sup>high</sup>, increased CD184<sup>-</sup> subset, CD49f<sup>-</sup>/CD200<sup>high</sup>, confirming previous reports (see Pruszek *et al.*, 2009; Yuan *et al.*, 2011; Turaç *et al.*, 2013).

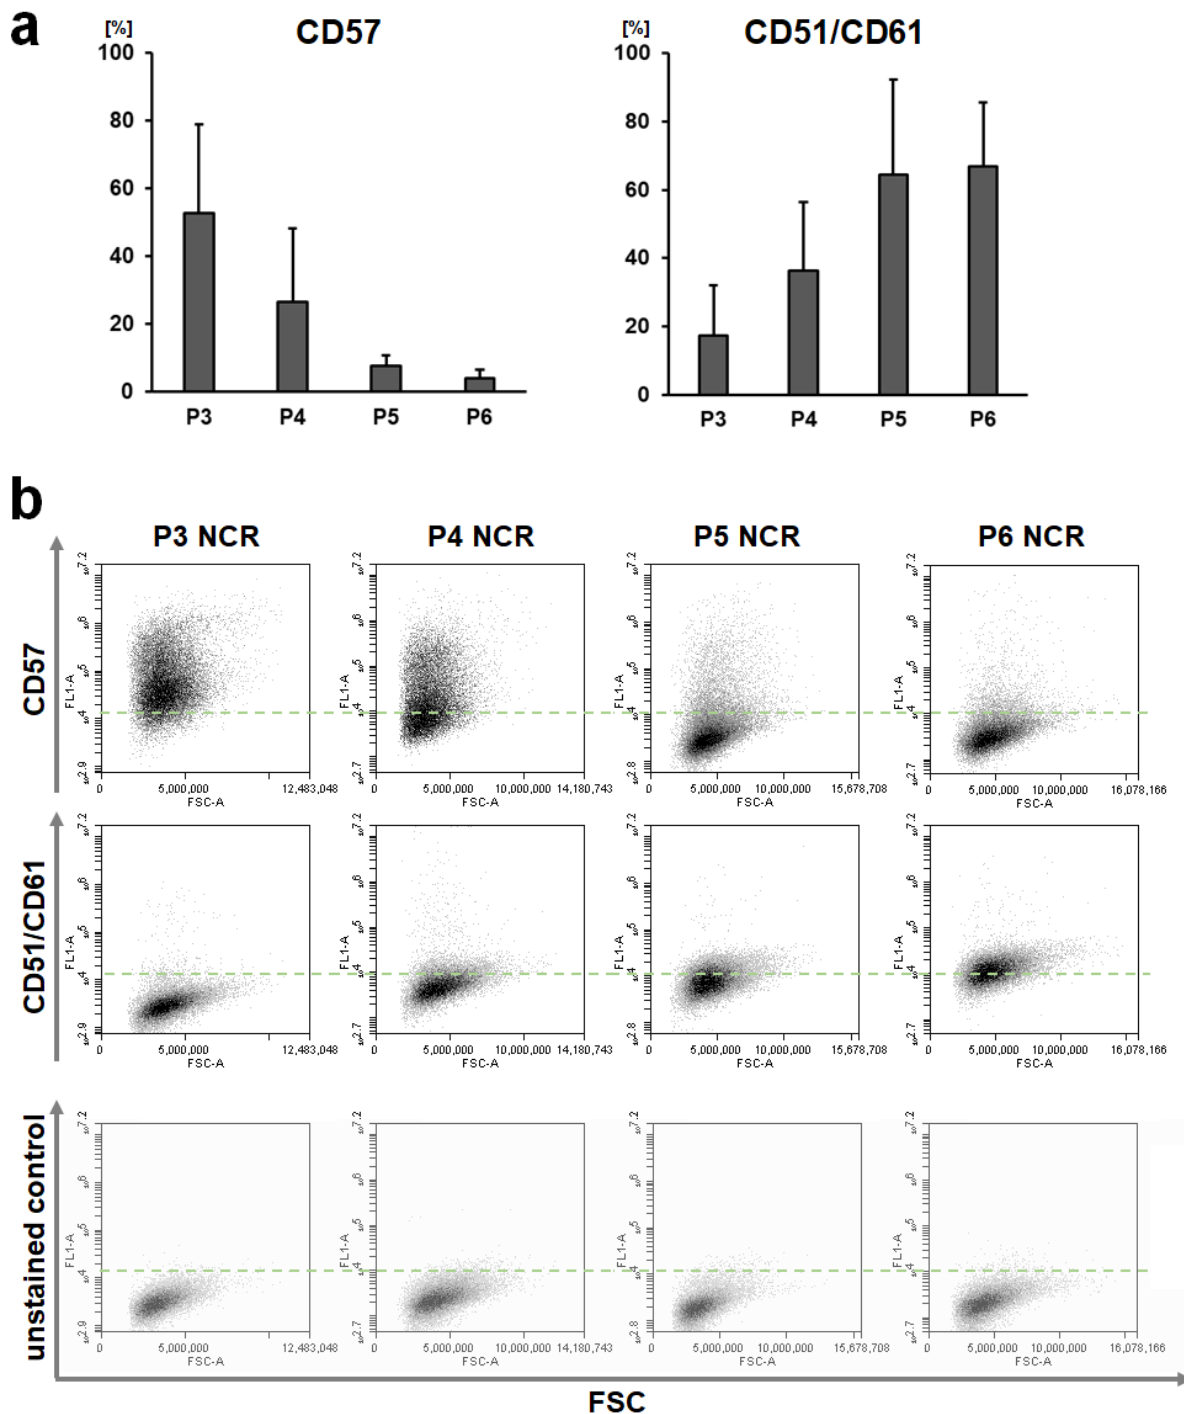

**Suppl. Fig. 2:** (a) Bar graphs depicting percentage of surface antigen expression for CD57 (left) and CD51/CD61 (right panel) positive fractions over the course of NCR passaging in vitro, P3 to P6, the period exhibiting the most profound phenotypic changes ( $n \geq 4$  independent experimental repeats). (b) Flow cytometric dot plots showing overall decrease of the glycan epitope CD57 (top) and of the integrin CD51/CD61 (mid row) antigens over the course of P3 to P6. Bottom row shows corresponding unstained control samples acquired at the same voltage and shown with identical plot specifications. A representative experiment of the above series is shown.
